# Supplementary material for: Tart Cherry Concentrate Does Not Alter the Gut Microbiome, Glycaemic Control or Systemic Inflammation in a Middle-Aged Population
Source: MDPI journal article supplement (doi:10.3390/nu11051063), 2019-05-13
Supplement: s1 [file s1]

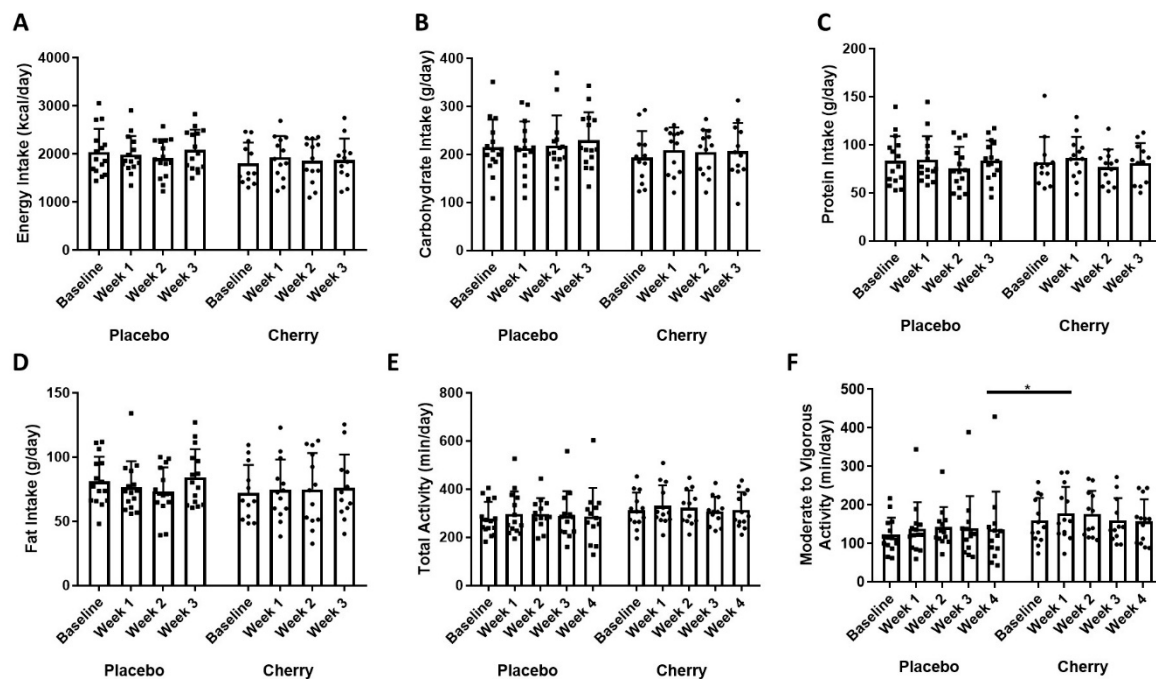

**Figure S1.** Energy Intake and Physical Activity in Placebo and Montmorency Cherry Supplemented Middle-Aged Participants.
